# Supplementary material for: Enhancing the photo-response performance of a SnSe-based photoelectrochemical photodetector via Ga doping
Source: Royal Society of Chemistry journal article supplement (doi:10.1039/d3tc03937d), 2024-01-01
Supplement: d3tc03937d1.pdf [file d3tc03937d1.pdf]

## Supporting Information

### Enhancing the photo-response performance of SnSe-based photoelectrochemical photodetector via Ga doping

Zhiping Liang<sup>a</sup>, Run Hao<sup>a</sup>, Hualong Luo<sup>a</sup>, Zhenming He<sup>a</sup>, Liumei Su<sup>a,\*</sup>, and Xing Fan<sup>b,\*</sup>

<sup>a</sup> State Key Laboratory of Featured Metal Materials and Life-cycle Safety for Composite Structures, MOE Key Laboratory of New Processing Technology for Nonferrous Metals and Materials, School of Resources, Environment and Materials, Guangxi University, Nanning 530004, China.

<sup>b</sup> Guangxi Key Laboratory of Advanced Structural Materials and Carbon Neutralization, School of Materials and Environment, Guangxi Colleges and Universities Key Laboratory of Environmental-friendly Materials and New Technology for Carbon Neutralization, Guangxi Minzu University, Nanning 530006, China.

\* Corresponding author. Email: [suliumei2020@gxu.edu.cn](mailto:suliumei2020@gxu.edu.cn), [fanxing@gxmzu.edu.cn](mailto:fanxing@gxmzu.edu.cn)

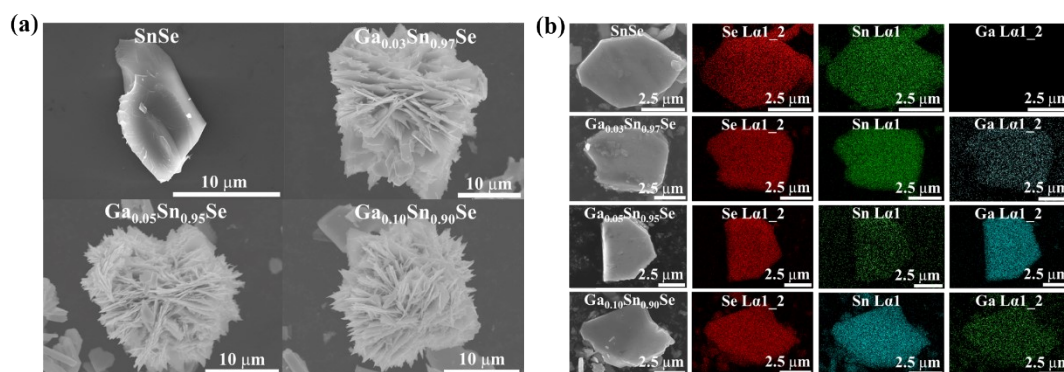

Fig. S1 (a) FESEM images and (b) EDS mapping of SnSe and Ga<sub>x</sub>Sn<sub>1-x</sub>Se.

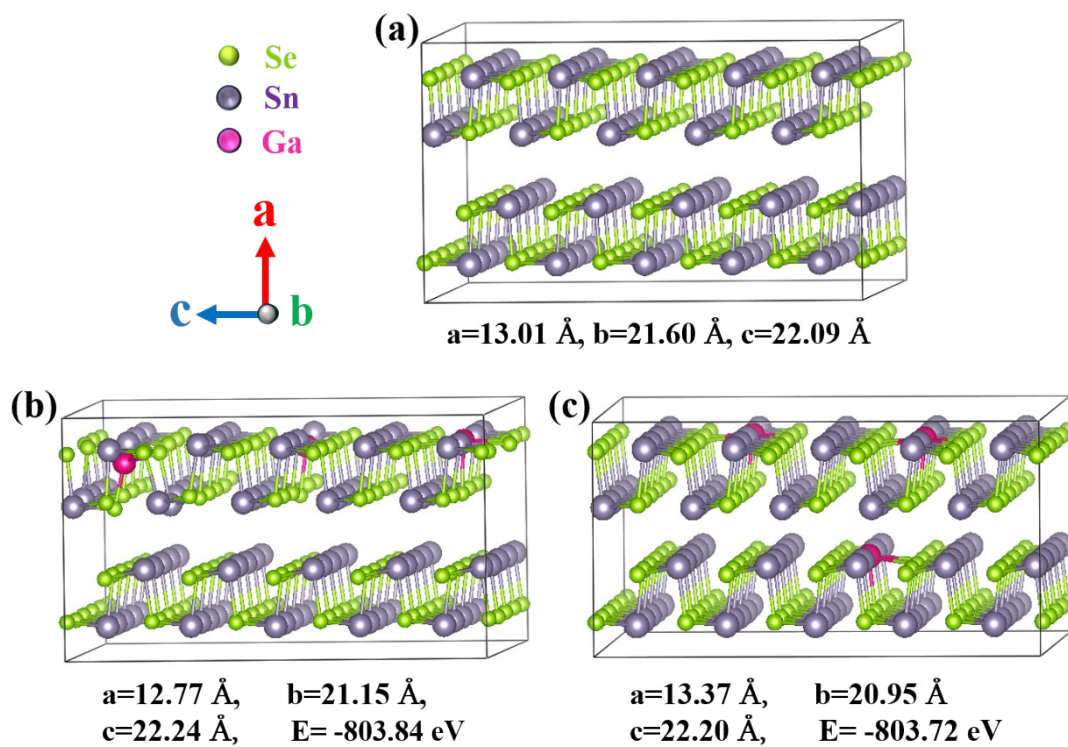

Fig. S2 Crystal structures of (a) SnSe and (b-c)  $\text{Ga}_{0.03}\text{Sn}_{0.97}\text{Se}$ .

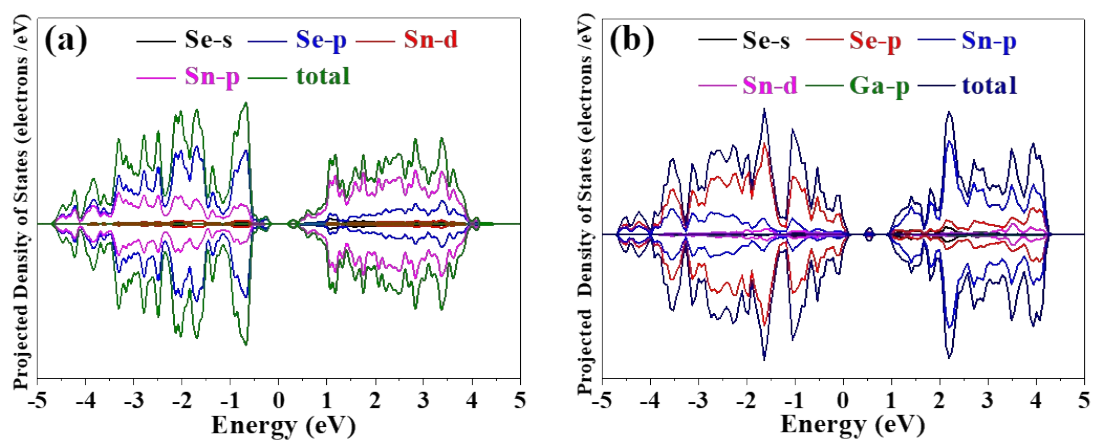

Fig. S3 Projected density of states for (a) SnSe and (b)  $\text{Ga}_{0.03}\text{Sn}_{0.97}\text{Se}$ .

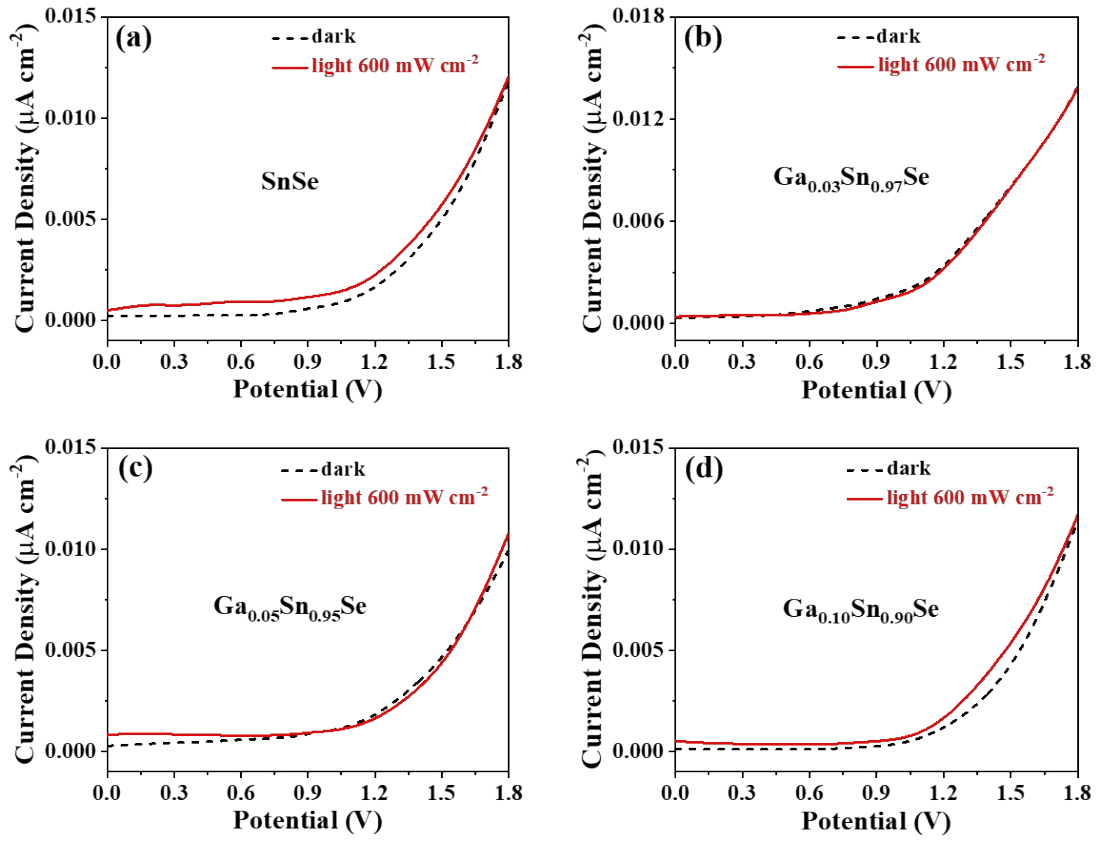

Fig. S4 The linear sweep voltammogram (LSV) curves of SnSe/ $\text{Ga}_x\text{Sn}_{1-x}\text{Se}$ -based PEC photodetectors with and without the illumination of white light ( $600 \text{ mW cm}^{-2}$ ).

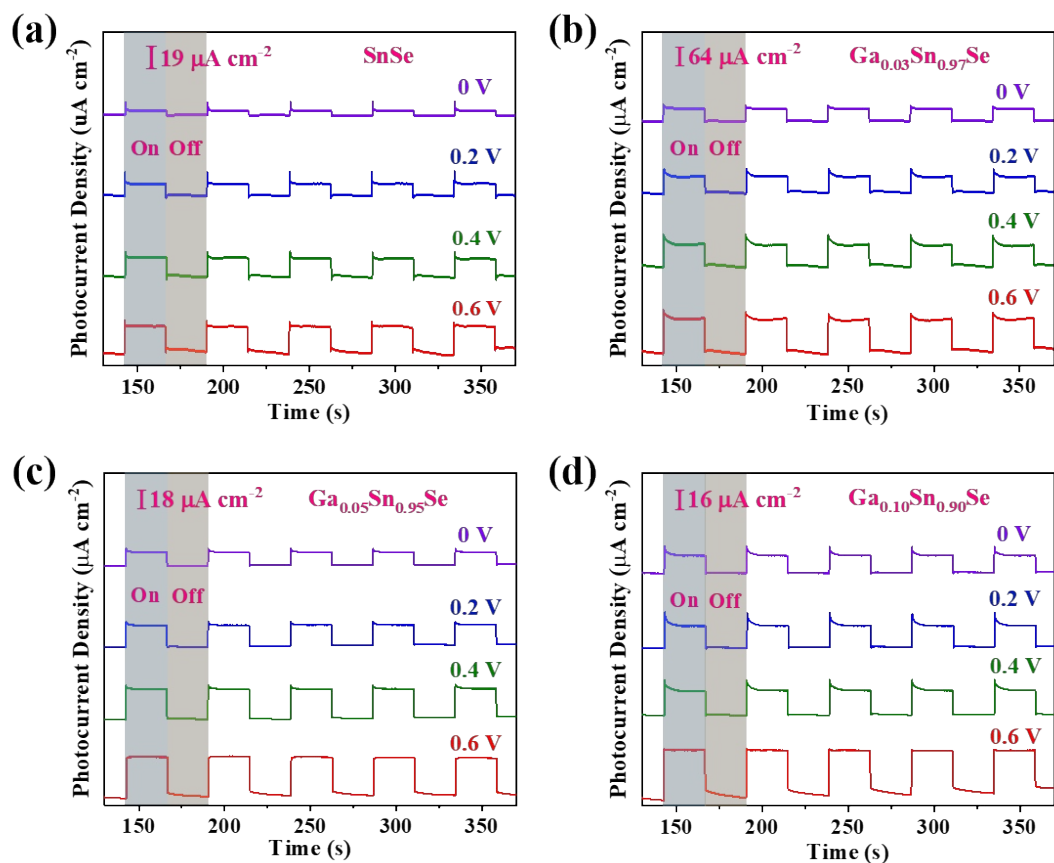

Fig. S5 I-t curves of SnSe/Ga<sub>x</sub>Sn<sub>1-x</sub>Se-based PEC photodetectors under the illumination of white light (600 mW cm<sup>-2</sup>) with various bias voltages.

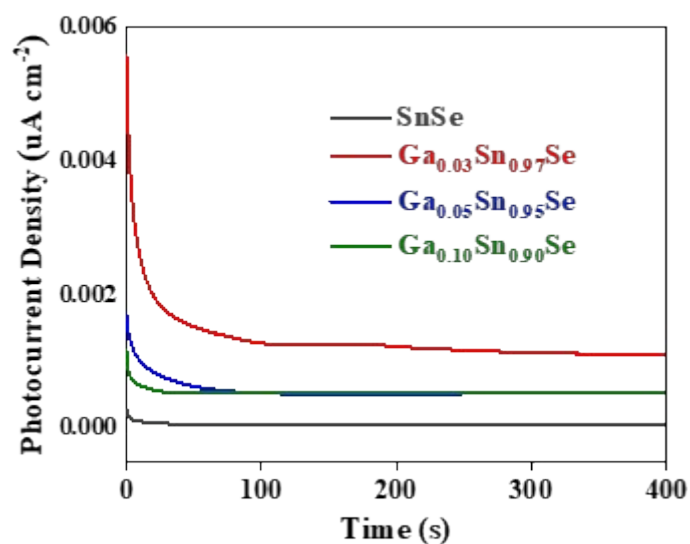

Fig S6. I-T curves of SnSe/Ga<sub>x</sub>Sn<sub>1-x</sub>Se-based PEC photodetectors under dark conditions.

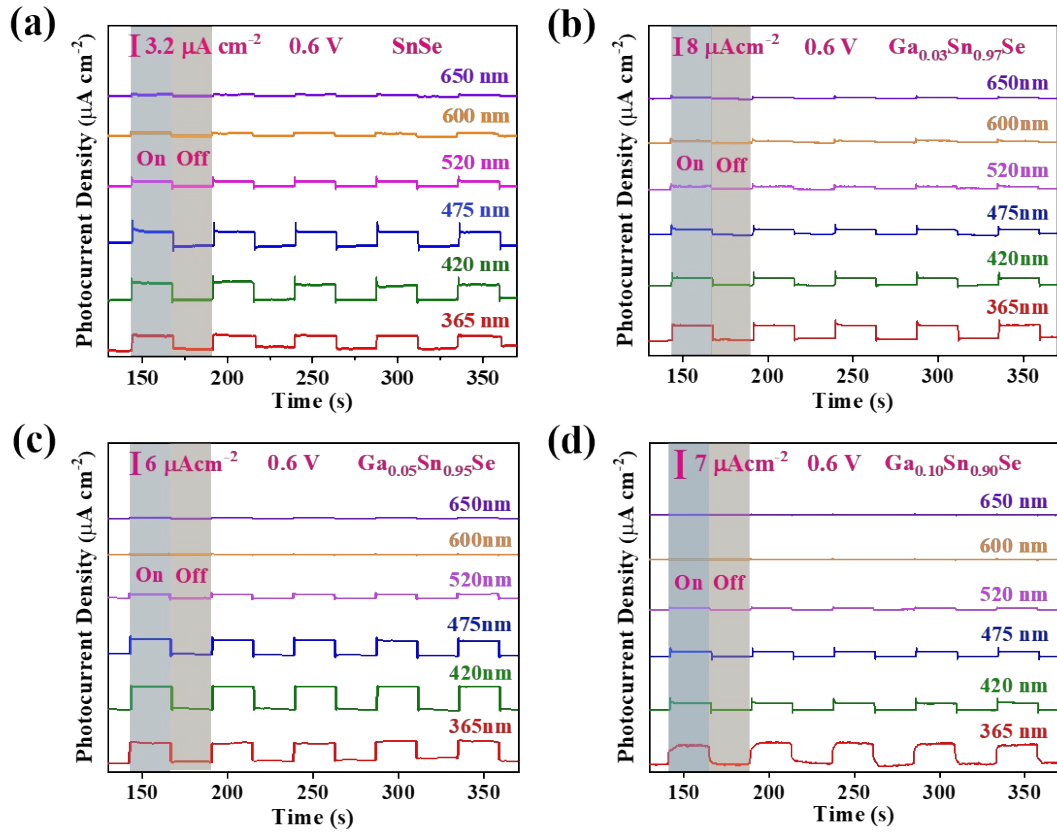

Fig. S7 I-t curves of SnSe/ $\text{Ga}_x\text{Sn}_{1-x}\text{Se}$ -based PEC photodetectors under the illumination of different quasi-monochromatic lights.

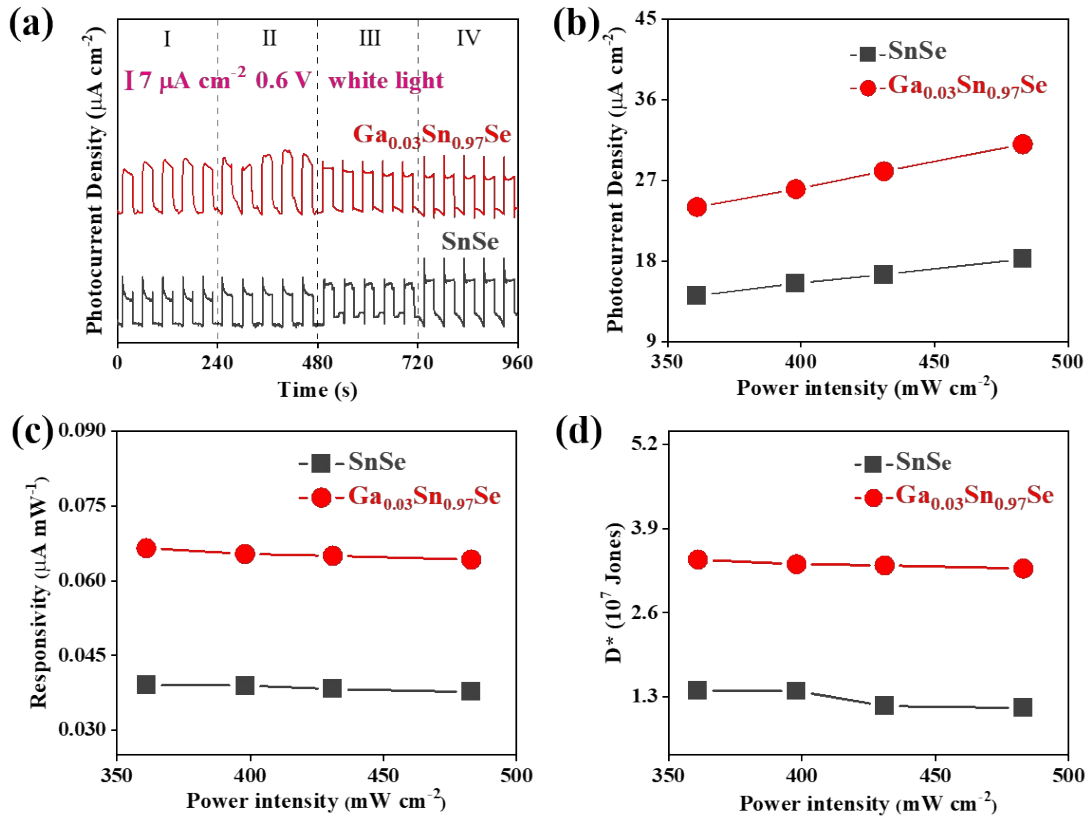

Fig. S8 (a) Photo-response of SnSe/Ga<sub>0.03</sub>Sn<sub>0.97</sub>Se-based PEC photodetectors under the illumination of white light with different power intensities. (b) Corresponding  $I_{ph}$ , (c) the calculated  $R_{ph}$ , (d) and  $D^*$  of SnSe/Ga<sub>0.03</sub>Sn<sub>0.97</sub>Se-based photodetector.

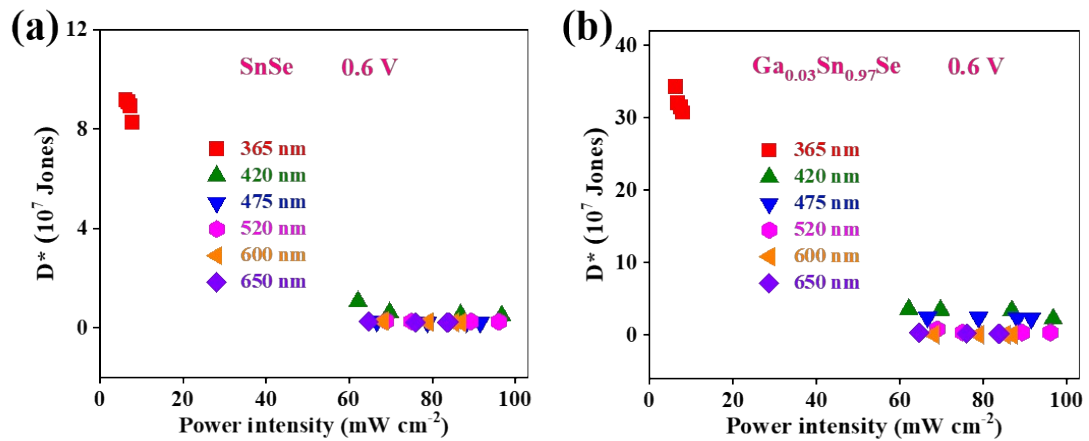

Fig. S9 The  $D^*$  of SnSe/Ga<sub>0.03</sub>Sn<sub>0.97</sub>Se-based photodetector illuminated by various wavelengths of light with different power intensities.

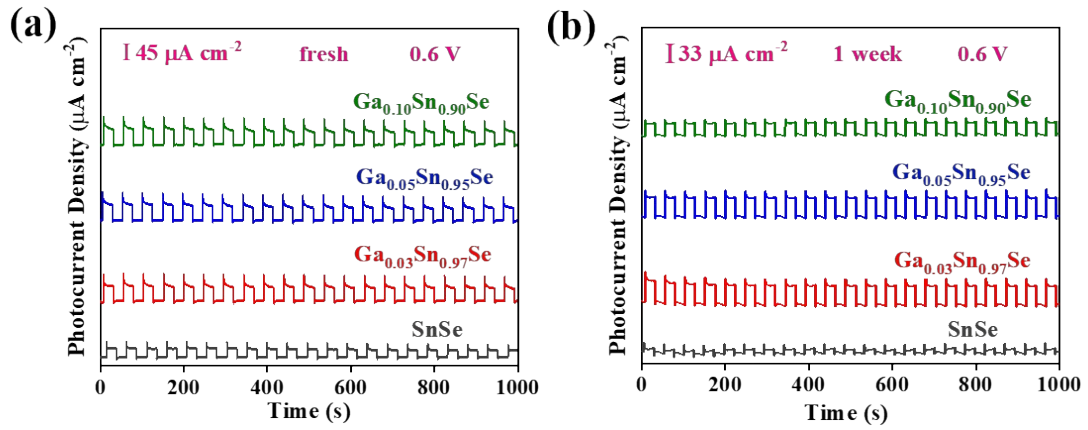

Fig. S10 Time stability test of SnSe/Ga<sub>x</sub>Sn<sub>1-x</sub>Se-based PEC photodetector with time duration of one week in 0.5 M KOH.

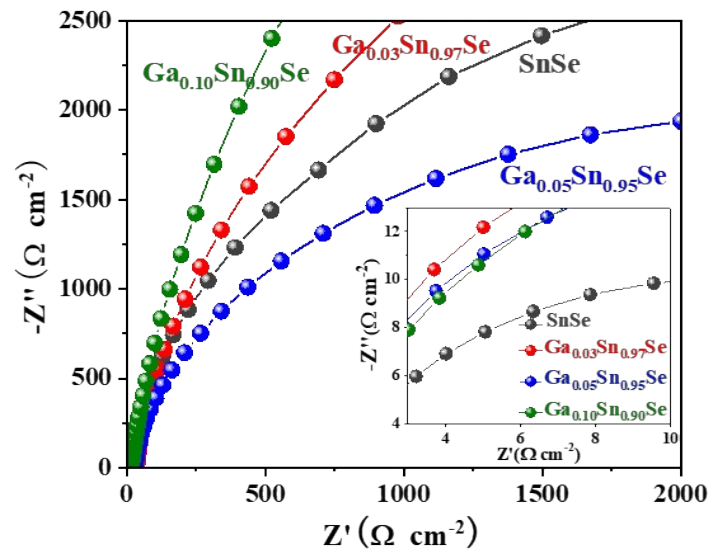

Fig. S11 The EIS curves of SnSe/Ga<sub>x</sub>Sn<sub>1-x</sub>Se-based PEC photodetector (Inset: enlarged image of the high-frequency part).

Table S1. PEC Photo-response parameters of SnSe/Ga<sub>x</sub>Sn<sub>1-x</sub>Se-based PEC photodetectors.

| System                                   |        | I<br>( $\mu\text{A cm}^{-2}$ ) | P<br>( $\text{mW cm}^{-2}$ ) | R<br>( $\mu\text{A mW}^{-1}$ ) | D*<br>( $10^7$ Jones) |
|------------------------------------------|--------|--------------------------------|------------------------------|--------------------------------|-----------------------|
| SnSe                                     | 0.6 V  | 28.90                          | 600                          | 0.05                           | 1.17                  |
|                                          | 0.4 V  | 18.81                          | 600                          | 0.03                           | 1.34                  |
|                                          | 0.2 V  | 10.74                          | 600                          | 0.02                           | 1.22                  |
|                                          | 0 V    | 4.32                           | 600                          | 0.01                           | 0.88                  |
|                                          | 365 nm | 3.20                           | 6.17                         | 0.52                           | 3.01                  |
|                                          | 420 nm | 4.01                           | 87                           | 0.05                           | 0.87                  |
|                                          | 475 nm | 3.10                           | 95                           | 0.03                           | 0.19                  |
|                                          | 520 nm | 1.30                           | 88.50                        | 0.01                           | 0.21                  |
|                                          | 600 nm | 0.27                           | 94.20                        | 0.00                           | 0                     |
| 650 nm                                   | 0.20   | 87.90                          | 0.00                         | 0                              |                       |
| Ga <sub>0.03</sub> Sn <sub>0.97</sub> Se | 0.6 V  | 114                            | 600                          | 0.19                           | 3.31                  |
|                                          | 0.4 V  | 85.30                          | 600                          | 0.14                           | 3.04                  |
|                                          | 0.2 V  | 64.16                          | 600                          | 0.11                           | 2.67                  |
|                                          | 0 V    | 41.66                          | 600                          | 0.07                           | 2.06                  |
|                                          | 365 nm | 9.86                           | 6.17                         | 1.60                           | 26.4                  |
|                                          | 420 nm | 13.23                          | 87                           | 0.15                           | 2.74                  |
|                                          | 475 nm | 6.57                           | 95                           | 0.07                           | 1.39                  |
|                                          | 520 nm | 2.50                           | 88.50                        | 0.03                           | 0.63                  |
| 600 nm                                   | 1.35   | 94.20                          | 0.01                         | 0.21                           |                       |
| 650 nm                                   | 0.90   | 87.90                          | 0.01                         | 0.22                           |                       |
| Ga <sub>0.05</sub> Sn <sub>0.95</sub> Se | 0.6 V  | 48.39                          | 600                          | 0.08                           | 1.72                  |
|                                          | 0.4 V  | 41.60                          | 600                          | 0.07                           | 1.94                  |
|                                          | 0.2 V  | 30                             | 600                          | 0.05                           | 1.89                  |
|                                          | 0 V    | 18.30                          | 600                          | 0.03                           | 1.83                  |
|                                          | 365 nm | 7.80                           | 6.17                         | 1.26                           | 22.70                 |



|                                          |        |       |       |      |      |
|------------------------------------------|--------|-------|-------|------|------|
|                                          | 420 nm | 7.92  | 87    | 0.09 | 1.86 |
|                                          | 475 nm | 6.46  | 95    | 0.07 | 1.52 |
|                                          | 520 nm | 2.30  | 88.50 | 0.03 | 0.69 |
|                                          | 600 nm | 1.10  | 94.20 | 0.01 | 0.23 |
|                                          | 650 nm | 0.82  | 87.90 | 0.01 | 0.24 |
|                                          | 0.6 V  | 43.16 | 600   | 0.07 | 1.97 |
|                                          | 0.4 V  | 29.30 | 600   | 0.05 | 1.76 |
|                                          | 0.2 V  | 27.39 | 600   | 0.05 | 2.07 |
|                                          | 0 V    | 15.75 | 600   | 0.03 | 1.54 |
| Ga <sub>0.10</sub> Sn <sub>0.90</sub> Se | 365 nm | 7.24  | 6.17  | 1.17 | 13.3 |
|                                          | 420 nm | 7.30  | 87    | 0.08 | 1.04 |
|                                          | 475 nm | 4.72  | 95    | 0.05 | 1.07 |
|                                          | 520 nm | 1.91  | 88.50 | 0.02 | 0.51 |
|                                          | 600 nm | 0.37  | 94.20 | 0.00 | 0    |
|                                          | 650 nm | 0.23  | 87.90 | 0.00 | 0    |

Table S2. PEC Photo-response parameters of SnSe-based PEC photodetectors under various wavelengths with different light densities.

| SnSe           |     | I<br>( $\mu\text{A cm}^{-2}$ ) | P<br>( $\text{mW cm}^{-2}$ ) | R<br>( $\mu\text{A mW}^{-1}$ ) | D*<br>( $10^7$ Jones) |
|----------------|-----|--------------------------------|------------------------------|--------------------------------|-----------------------|
| white<br>light | I   | 14.1                           | 361                          | 0.039                          | 1.4                   |
|                | II  | 15.5                           | 398                          | 0.0389                         | 1.39                  |
|                | III | 16.49                          | 431                          | 0.038                          | 1.16                  |
|                | IV  | 18.2                           | 483                          | 0.0377                         | 1.13                  |
| 365 nm         | I   | 1.1                            | 6.21                         | 0.177                          | 9.15                  |
|                | II  | 1.2                            | 6.81                         | 0.176                          | 9.07                  |
|                | III | 1.3                            | 7.38                         | 0.176                          | 8.92                  |
|                | IV  | 1.31                           | 7.88                         | 0.166                          | 8.25                  |
| 420 nm         | I   | 1.34                           | 62.1                         | 0.022                          | 1.06                  |

|        |     |      |      |         |      |
|--------|-----|------|------|---------|------|
|        | II  | 1.38 | 69.7 | 0.02    | 0.63 |
|        | III | 1.52 | 86.8 | 0.0175  | 0.52 |
|        | IV  | 1.56 | 96.7 | 0.0161  | 0.48 |
| 475 nm | I   | 0.55 | 66.6 | 0.008   | 0.26 |
|        | II  | 0.59 | 78.8 | 0.007   | 0.22 |
|        | III | 0.63 | 88.1 | 0.007   | 0.21 |
|        | IV  | 0.65 | 91.5 | 0.007   | 0.21 |
| 520 nm | I   | 0.52 | 68.9 | 0.0075  | 0.27 |
|        | II  | 0.56 | 75   | 0.00746 | 0.26 |
|        | III | 0.66 | 89.3 | 0.0074  | 0.26 |
|        | IV  | 0.70 | 96   | 0.0073  | 0.24 |
| 600 nm | I   | 0.42 | 68.1 | 0.0062  | 0.26 |
|        | II  | 0.46 | 78.8 | 0.0058  | 0.23 |
|        | III | 0.47 | 85.1 | 0.0055  | 0.21 |
|        | IV  | 0.49 | 86.8 | 0.0056  | 0.21 |
| 650 nm | I   | 0.36 | 64.6 | 0.0055  | 0.25 |
|        | II  | 0.37 | 76   | 0.0049  | 0.22 |
|        | III | 0.38 | 83.5 | 0.0045  | 0.21 |
|        | IV  | 0.39 | 83.9 | 0.0046  | 0.21 |

Table S3. PEC Photo-response parameters of  $\text{Ga}_x\text{Sn}_{1-x}\text{Se}$ -based PEC photodetectors under various wavelengths with different light densities.

| $\text{Ga}_{0.03}\text{Sn}_{0.97}\text{Se}$ |     | I                         | P                       | R                               | D*              |
|---------------------------------------------|-----|---------------------------|-------------------------|---------------------------------|-----------------|
|                                             |     | ( $\mu\text{A cm}^{-2}$ ) | ( $\text{mW cm}^{-2}$ ) | ( $\mu\text{A mW}^{-1}$ )<br>1) | ( $10^7$ Jones) |
| white light                                 | I   | 24                        | 361                     | 0.066                           | 3.42            |
|                                             | II  | 26                        | 398                     | 0.0653                          | 3.35            |
|                                             | III | 28                        | 431                     | 0.065                           | 3.33            |
|                                             | IV  | 31                        | 483                     | 0.0663                          | 3.28            |

|        |     |       |      |         |      |
|--------|-----|-------|------|---------|------|
| 365 nm | I   | 5.707 | 6.21 | 0.919   | 34.3 |
|        | II  | 6.1   | 6.81 | 0.896   | 32   |
|        | III | 6.38  | 7.38 | 0.864   | 31.5 |
|        | IV  | 6.8   | 7.88 | 0.863   | 30.7 |
| 420 nm | I   | 5.97  | 62.1 | 0.096   | 3.54 |
|        | II  | 6.63  | 69.7 | 0.095   | 3.43 |
|        | III | 8.2   | 86.8 | 0.094   | 3.36 |
|        | IV  | 9.02  | 96.7 | 0.093   | 2.22 |
| 475 nm | I   | 2.99  | 66.6 | 0.045   | 2.44 |
|        | II  | 3.5   | 78.8 | 0.044   | 2.4  |
|        | III | 3.87  | 88.1 | 0.0439  | 2.34 |
|        | IV  | 4     | 91.5 | 0.0437  | 2.31 |
| 520 nm | I   | 1.5   | 68.9 | 0.022   | 0.78 |
|        | II  | 1.6   | 75   | 0.0021  | 0.34 |
|        | III | 1.8   | 89.3 | 0.02    | 0.32 |
|        | IV  | 1.9   | 96   | 0.0197  | 0.32 |
| 600 nm | I   | 0.121 | 68.1 | 0.0018  | 0.04 |
|        | II  | 0.14  | 78.8 | 0.0018  | 0.04 |
|        | III | 0.15  | 85.1 | 0.00176 | 0.03 |
|        | IV  | 0.152 | 86.8 | 0.00175 | 0.03 |
| 650 nm | I   | 0.37  | 64.6 | 0.0057  | 0.30 |
|        | II  | 0.38  | 76   | 0.005   | 0.21 |
|        | III | 0.415 | 83.5 | 0.00497 | 0.20 |
|        | IV  | 0.416 | 83.9 | 0.00496 | 0.18 |
